# Supplementary material for: A bioreactor applied solely with ammonium and inorganic C maintains an extremely diverse archaeal and bacterial community even after nine years
Source: Research Square preprint supplement (doi:10.21203/rs.3.rs-8594864/v1), 2026-01-19
Supplement: Supplementary file 1 [file 1c1c76fa567000cda65a7e7d.docx]

Table S1. The number of sequences, and bacterial and archaeal phyla, classes, orders, families, genera and species in the nitrifying laboratory-scale continuous stirred tank after nine years of similar conditions.

| ⎯⎯⎯⎯⎯⎯⎯⎯⎯⎯⎯⎯⎯⎯⎯⎯⎯⎯⎯⎯⎯⎯⎯⎯⎯⎯⎯⎯⎯⎯⎯⎯⎯⎯⎯⎯ | | | |
| --- | --- | --- | --- |
| Taxonomic level | Bacteria | Archaea |
| ⎯⎯⎯⎯⎯⎯⎯⎯⎯⎯⎯⎯⎯⎯⎯⎯⎯⎯⎯⎯⎯⎯⎯⎯⎯⎯⎯⎯⎯⎯⎯⎯⎯⎯⎯⎯ | | | |
| Phylum | 38 | 5 |
| Class | 81 | 12 |
| Order | 180 | 23 |
| Family | 364 | 38 |
| Genus | 1242 | 110 |
| Species | 4483 | 245 |
| Number of sequences | 70,606,106 | 8,071,654 |
| ⎯⎯⎯⎯⎯⎯⎯⎯⎯⎯⎯⎯⎯⎯⎯⎯⎯⎯⎯⎯⎯⎯⎯⎯⎯⎯⎯⎯⎯⎯⎯⎯⎯⎯⎯⎯ | | | |
