# Supplementary material for: A bioreactor applied solely with ammonium and inorganic C maintains an extremely diverse archaeal and bacterial community even after nine years
Source: Research Square preprint supplement (doi:10.21203/rs.3.rs-8594864/v1), 2026-01-19
Supplement: Supplementary file 4 [file 79f43b110d96b2f979258225.docx]

Table S3. The temporal and spatial coefficient of variation (CV (%): ratio of standard deviation versus mean of the microbial community in a nitrifying laboratory-scale continuous stirred tank after 9 years of similar conditions.

| ⎯⎯⎯⎯⎯⎯⎯⎯⎯⎯⎯⎯⎯⎯⎯⎯⎯⎯⎯⎯⎯⎯⎯⎯⎯⎯⎯⎯⎯⎯⎯⎯⎯⎯⎯ | | | | | | | | |
| --- | --- | --- | --- | --- | --- | --- | --- | --- |
|  | Bacteria | | | Archaea | | |
| Taxonomic level | | Temporal | Spatial | | Temporal | Spatial | |
| ⎯⎯⎯⎯⎯⎯⎯⎯⎯⎯⎯⎯⎯⎯⎯⎯⎯⎯⎯⎯⎯⎯⎯⎯⎯⎯⎯⎯⎯⎯⎯⎯⎯⎯⎯ | | | | | | | | |
| Phylum | | 34 | 10 | | 35 | 14 | |
| Class | | 29 | 10 | | 25 | 11 | |
| Order | | 25 | 8 | | 24 | 12 | |
| Family | | 26 | 9 | | 23 | 18 | |
| Genus | | 28 | 14 | | 26 | 17 | |
| Species | | 16 a | 6 a | | 32 | 22 | |
| Mean | | 26 | 10 | | 28 | 16 | |
| ⎯⎯⎯⎯⎯⎯⎯⎯⎯⎯⎯⎯⎯⎯⎯⎯⎯⎯⎯⎯⎯⎯⎯⎯⎯⎯⎯⎯⎯⎯⎯⎯⎯⎯⎯ | | | | | | | | |
| a The 1000 most abundant bacterial groups were considered. | | | | | | | | |
| ⎯⎯⎯⎯⎯⎯⎯⎯⎯⎯⎯⎯⎯⎯⎯⎯⎯⎯⎯⎯⎯⎯⎯⎯⎯⎯⎯⎯⎯⎯⎯⎯⎯⎯⎯ | | | | | | | | |
