# Supplementary material for: A bioreactor applied solely with ammonium and inorganic C maintains an extremely diverse archaeal and bacterial community even after nine years
Source: Research Square preprint supplement (doi:10.21203/rs.3.rs-8594864/v1), 2026-01-19
Supplement: Supplementary file 7 [file d85eafb7e73ece62d851edfb.docx]

Table S2. A summary of some the genes detected in the bioreactor involved in nitrogen cycling processes.

| ⎯⎯⎯⎯⎯⎯⎯⎯⎯⎯⎯⎯⎯⎯⎯⎯⎯⎯⎯⎯⎯⎯⎯⎯⎯⎯⎯⎯⎯⎯⎯⎯⎯⎯⎯⎯⎯⎯⎯⎯⎯⎯⎯⎯ | | | |
| --- | --- | --- | --- |
| **Gene** | **Description** | | |
| ⎯⎯⎯⎯⎯⎯⎯⎯⎯⎯⎯⎯⎯⎯⎯⎯⎯⎯⎯⎯⎯⎯⎯⎯⎯⎯⎯⎯⎯⎯⎯⎯⎯⎯⎯⎯⎯⎯⎯⎯⎯⎯⎯⎯ | | | |
| **Nitrification Ammonium monooxygenase: Archaea** | |
| *amoA* | Ammonia monooxygenase subunit A [Candidatus Nitrosocosmicus arcticus] (https://www.uniprot.org/uniprot/A0A5B8ZQL0) | | |
| *amoB* | Putative archaeal ammonia monooxygenase subunit B [[*Candidatus* Nitrosocaldus yellowstonensis](https://www.uniprot.org/taxonomy/498375)**]** (https://www.uniprot.org/uniprot/B0LKZ4) (You et al., 2009) | | |
| *amoC* | Ammonia monooxygenase/methane monooxygenase subunit C [uncultured marine Thaumarchaeote SAT1000_12_G09] (https://www.uniprot.org/uniprot/A0A075I301) | | |
| ⎯⎯⎯⎯⎯⎯⎯⎯⎯⎯⎯⎯⎯⎯⎯⎯⎯⎯⎯⎯⎯⎯⎯⎯⎯⎯⎯⎯⎯⎯⎯⎯⎯⎯⎯⎯⎯⎯⎯⎯⎯⎯⎯⎯ | | | |
| **Nitrification Ammonium monooxygenase: Bacteria** | |  |
| ⎯⎯⎯⎯⎯⎯⎯⎯⎯⎯⎯⎯⎯⎯⎯⎯⎯⎯⎯⎯⎯⎯⎯⎯⎯⎯⎯⎯⎯⎯⎯⎯⎯⎯⎯⎯⎯⎯⎯⎯⎯⎯⎯⎯ | | | |
| *amoA* | Ammonia monooxygenase subunit A. Part of the ammonia monooxygenase complex, which catalyzes the oxidation of ammonia to hydroxylamine [Nitrosomonas europaea (strain ATCC 19718)](<https://www.uniprot.org/uniprot/Q04507>) | | |
| *amoB* | Ammonia monooxygenase subunit B. Part of the ammonia monooxygenase complex, which catalyzes the oxidation of ammonia to hydroxylamine, the first reaction in the process of ammonia oxidation to nitrite. [Nitrosomonas europaea (strain ATCC 19718)] (https://www.uniprot.org/uniprot/Q04508) | | |
| *amoC* | Ammonia monooxygenase subunit C [Nitrosomonas europaea b] | | |
| ⎯⎯⎯⎯⎯⎯⎯⎯⎯⎯⎯⎯⎯⎯⎯⎯⎯⎯⎯⎯⎯⎯⎯⎯⎯⎯⎯⎯⎯⎯⎯⎯⎯⎯⎯⎯⎯⎯⎯⎯⎯⎯⎯⎯ | | | |
| **Nitrification** | |
| ⎯⎯⎯⎯⎯⎯⎯⎯⎯⎯⎯⎯⎯⎯⎯⎯⎯⎯⎯⎯⎯⎯⎯⎯⎯⎯⎯⎯⎯⎯⎯⎯⎯⎯⎯⎯⎯⎯⎯⎯⎯⎯⎯⎯ | | | |
| *hao* | Hydroxylamine oxidoreductase [*Nitrosomonas* mobilis] (https://www.uniprot.org/uniprot/A0A1G5SG74) | | |
| *nxrA* | Putative nitrite oxidoreductase, alpha subunit [*Nitrospira japonica*] (https://www.uniprot.org/uniprot/A0A1W1I298): contains the substrate-binding site with themolybdopterin cofactor (Mo-co) (Lücker et al., 2010) | | |
| *nxrB* | Putative nitrite oxidoreductase, beta subunit [*Nitrospira japonica*] (/https://www.uniprot.org/uniprot/A0A1W1I5Y1) Contains [Fe-S] clusters and probably channels electrons from the alpha to the gamma subunit or directly to the membrane-integral electron transport chain (Lücker et al., 2010). | | |
| ⎯⎯⎯⎯⎯⎯⎯⎯⎯⎯⎯⎯⎯⎯⎯⎯⎯⎯⎯⎯⎯⎯⎯⎯⎯⎯⎯⎯⎯⎯⎯⎯⎯⎯⎯⎯⎯⎯⎯⎯⎯⎯⎯⎯ | | | |
| **Dissimilatory NO3- reductase: membrane bound** | |
| ⎯⎯⎯⎯⎯⎯⎯⎯⎯⎯⎯⎯⎯⎯⎯⎯⎯⎯⎯⎯⎯⎯⎯⎯⎯⎯⎯⎯⎯⎯⎯⎯⎯⎯⎯⎯⎯⎯⎯⎯⎯⎯⎯⎯ | | | |
| *narB* | Putative respiratory nitrate reductase subunit Rieske.The respiratory membrane-bound nitrate reductase enzyme complex plays a role in generation of metabolic energy by using nitrate as a terminal electron acceptor during anaerobic conditions [Haloferax mediterranei] (https://www.uniprot.org/uniprot/I3R9N2). Required for NO and N2O production in *Rhizobium etli* CFN42 (Hidalgo-García et al., 2019). | | |
| *narC* | Encodes for cytochrome *b-*561 in the dissimilatory nitrate reductase operon of *Haloarcula marismortui* (Yoshimatsu et al., 2007). Nitrate reductase catalytic subunit [*Streptomyces griseorubens*] (Feng et al., 2014) | | |
| *narG* | Nitrate reductase subunit alpha gamma [Escherichia coli str. K-12 substr. MG1655]. Induced by anaerobiosis plus nitrate. The subunit of nitrate reductase A is the actual site of nitrate reduction and also contains the molybdenum cofactor. (https://www.ncbi.nlm.nih.gov/gene/945782). | | |
| *narH* | Nitrate reductase subunit beta [Escherichia coli str. K-12 substr. MG1655]. Induced by anaerobiosis plus nitrate. The subunit is the electron transfer subunit containing the iron-sulfur clusters, one [3Fe-4S] cluster and three [4Fe-4S] clusters. (https://www.ncbi.nlm.nih.gov/gene/945780) | | |
| *narI* | Nitrate reductase subunit gamma [Escherichia coli str. K-12 substr. MG1655]. NarI is involved in localizing NarGHI to the membrane Induced by anaerobiosis plus nitrate. The subunit of nitrate reductase A is a membrane-embedded heme-iron subunit resembling cytochrome b, which transfers electrons from the quinone pool to the subunit. (https://www.ncbi.nlm.nih.gov/gene/945808) | | |
| *narJ* | Nitrate reductase 1 molybdenum cofactor assembly chaperone [Escherichia coli str. K-12 substr. MG1655]. NarJ has two NarG binding sites: one for Mo insertion and one to block membrane attachment via NarI until activation is complete. NarJ is part of the redox enzyme maturation protein (REMP) family of chaperones. (https://www.ncbi.nlm.nih.gov/gene/945807) | | |
| *narV* | Nitrate reductase Z subunit gamma [Escherichia coli str. K-12 substr. MG1655]. NarV is involved in lo calizing NarYZV to the membrane. The subunit is a membrane-embedded heme-iron subunit resembling cytochrome b, which transfers electrons from the quinone pool to the subunit. (https://www.ncbi.nlm.nih.gov/gene/946029) | | |
| *narY* | Nitrate reductase Z subunit beta [Escherichia coli str. K-12 substr. MG1655]. Stationary phase induced, RpoS-dependent. The subunit is the electron transfer subunit containing the iron-sulfur clusters. (https://www.ncbi.nlm.nih.gov/gene/946034) | | |
| *narZ* | Nitrate reductase Z subunit alpha [Escherichia coli str. K-12 substr. MG1655] Stationary phase induced, RpoS-dependent.. The subunit is the actual site of nitrate reduction and also contains the molybdenum cofactor. (https://www.ncbi.nlm.nih.gov/gene/945999) | | |
| ⎯⎯⎯⎯⎯⎯⎯⎯⎯⎯⎯⎯⎯⎯⎯⎯⎯⎯⎯⎯⎯⎯⎯⎯⎯⎯⎯⎯⎯⎯⎯⎯⎯⎯⎯⎯⎯⎯⎯⎯⎯⎯⎯⎯ | | | |
| **Dissimilatory NO3- reductase: periplasmic** | |
| ⎯⎯⎯⎯⎯⎯⎯⎯⎯⎯⎯⎯⎯⎯⎯⎯⎯⎯⎯⎯⎯⎯⎯⎯⎯⎯⎯⎯⎯⎯⎯⎯⎯⎯⎯⎯⎯⎯⎯⎯⎯⎯⎯⎯ | | | |
| *napA* | Periplasmic nitrate reductase subunit NapA [Escherichia coli str. K-12 substr. MG1655]. The napA gene encodes the periplasmic nitrate reductase molybdoprotein with an Fe-S center. (https://www.ncbi.nlm.nih.gov/gene/947093) | | |
| *napB* | Periplasmic nitrate reductase cytochrome c550 protein [Escherichia coli str. K-12 substr. MG1655]. The napB gene encodes the diheme cytochrome c550 protein which is complexed with NapA in the periplasm; it receives electrons from the membrane-bound proteins and passes them to NapA. (https://www.ncbi.nlm.nih.gov/gene/946698) | | |
| *napC* | Periplasmic nitrate reductase cytochrome c protein [Escherichia coli str. K-12 substr. MG1655]. NapC is essential for electron transfer from both ubiquinol and menaquinol to NapAB. The napC gene encodes a membrane-bound tetraheme cytochrome c protein, which passes electrons either from NapGH or directly from the quinone pool to NapB. (https://www.ncbi.nlm.nih.gov/gene/946706) | | |
| ⎯⎯⎯⎯⎯⎯⎯⎯⎯⎯⎯⎯⎯⎯⎯⎯⎯⎯⎯⎯⎯⎯⎯⎯⎯⎯⎯⎯⎯⎯⎯⎯⎯⎯⎯⎯⎯⎯⎯⎯⎯⎯⎯⎯ | | | |
| **Assimilatory NO3- reductase** | |
| ⎯⎯⎯⎯⎯⎯⎯⎯⎯⎯⎯⎯⎯⎯⎯⎯⎯⎯⎯⎯⎯⎯⎯⎯⎯⎯⎯⎯⎯⎯⎯⎯⎯⎯⎯⎯⎯⎯⎯⎯⎯⎯⎯⎯ | | | |
| *nasA* | Nitrate transporter [[*Pseudomonas aeruginosa* PAO1](https://www.ncbi.nlm.nih.gov/Taxonomy/Browser/wwwtax.cgi?id=208964)] (https://www.ncbi.nlm.nih.gov/gene/877748)  Assimilatory nitrate reductase [Haloferax mediterranei (strain ATCC 33500] Catalyzes the reduction of nitrate to nitrite using ferredoxin as the electron donor (https://www.uniprot.org/uniprot/I3R634) | | |
| *nasB* | Assimilatory nitrate reductase (electron transfer subunit NasB) [*Bacillus* *subtilus* subsp. Subtilis str. 168] (<https://www.ncbi.nlm.nih.gov/gene/938328>)  Nitrite reductase [NAD(P)H] large subunit [Klebsiella oxytoca] (https://www.uniprot.org/uniprot/Q06458) | | |
| *narB* | Nitrate reductase is a key enzyme involved in the first step of nitrate assimilation in plants, fungi and bacteria. [Synechocystis sp. (strain PCC 6803 / Kazusa)] (<https://www.uniprot.org/uniprot/P73448>). Nitrate reductase electron transfer subunit [*Streptomyces griseorubens*] (Feng et al., 2014) | | |
| *NR* | In eukaryotes, reduction of nitrate to nitrite is catalyzed by the molybdenum-containing NAD(P)H:nitrate reductase. (Fischer et al., 2005) | | |
| ⎯⎯⎯⎯⎯⎯⎯⎯⎯⎯⎯⎯⎯⎯⎯⎯⎯⎯⎯⎯⎯⎯⎯⎯⎯⎯⎯⎯⎯⎯⎯⎯⎯⎯⎯⎯⎯⎯⎯⎯⎯⎯⎯⎯ | | | |

Table S2. Continued.

| ⎯⎯⎯⎯⎯⎯⎯⎯⎯⎯⎯⎯⎯⎯⎯⎯⎯⎯⎯⎯⎯⎯⎯⎯⎯⎯⎯⎯⎯⎯⎯⎯⎯⎯⎯⎯⎯⎯⎯⎯⎯⎯⎯⎯ | | | |
| --- | --- | --- | --- |
| **Dissimilatory NO2- reductase** | |
| ⎯⎯⎯⎯⎯⎯⎯⎯⎯⎯⎯⎯⎯⎯⎯⎯⎯⎯⎯⎯⎯⎯⎯⎯⎯⎯⎯⎯⎯⎯⎯⎯⎯⎯⎯⎯⎯⎯⎯⎯⎯⎯⎯⎯ | | | |
| *nrfA* | Cytochrome c552 nitrite reductase [Escherichia coli str. K-12 substr. MG1655]. The gene nrfA is the structural gene for cytochrome C552, which functions as a formate-dependent nitrite reductase (https://www.ncbi.nlm.nih.gov/gene/948571)  Itcatalyzes the reduction of nitrite to ammonia, consuming six electrons in the process (https://www.uniprot.org/uniprot/P0ABK9) | | |
| *nrfC* | Putative menaquinol-cytochrome c reductase 4Fe-4S subunit [Escherichia coli str. K-12 substr. MG1655]. The nrfC gene encodes a transmembrane Fe-S protein, part of a nitrite reductase reaction, which may transfer electrons from the quinone pool to the c-type cytochromes or it may be an adapter that enables formate dehydrogenase H to transfer electrons into an electrogenic electron-transfer chain. (https://www.ncbi.nlm.nih.gov/gene/948581)  Protein NrfC https://www.uniprot.org/uniprot/P0AAK7 | | |
| ⎯⎯⎯⎯⎯⎯⎯⎯⎯⎯⎯⎯⎯⎯⎯⎯⎯⎯⎯⎯⎯⎯⎯⎯⎯⎯⎯⎯⎯⎯⎯⎯⎯⎯⎯⎯⎯⎯⎯⎯⎯⎯⎯⎯ | | | |
| **Assimilatory NO2- reductase** | |
| ⎯⎯⎯⎯⎯⎯⎯⎯⎯⎯⎯⎯⎯⎯⎯⎯⎯⎯⎯⎯⎯⎯⎯⎯⎯⎯⎯⎯⎯⎯⎯⎯⎯⎯⎯⎯⎯⎯⎯⎯⎯⎯⎯⎯ | | | |
| *nirA* | Nitrite reductase [*Anabaena* sp. Strain PCC 7120] (Frías and Flores, 2015) | | |
| *nirB* | Assimilatory nitrite reductase large subunit [*Pseudomonas aeruginosa* PAO1] (<https://www.ncbi.nlm.nih.gov/gene/877714)>). Nitrite reductase catalytic subunit NirB [Escherichia coli str. K-12 substr. MG1655] (https://www.ncbi.nlm.nih.gov/gene/947868) | | |
| *nirD* | The NAD(P)H-dependent nitrite reductase small subunit NirD is required for nitrite assimilation [[*Pseudomonas pseudoalcaligenes* CECT 5344]](https://www.ncbi.nlm.nih.gov/Taxonomy/Browser/wwwtax.cgi?id=1182590) (https://www.ncbi.nlm.nih.gov/gene/61799826) | | |
| ⎯⎯⎯⎯⎯⎯⎯⎯⎯⎯⎯⎯⎯⎯⎯⎯⎯⎯⎯⎯⎯⎯⎯⎯⎯⎯⎯⎯⎯⎯⎯⎯⎯⎯⎯⎯⎯⎯⎯⎯⎯⎯⎯⎯ | | | |
| **Denitrification** | |  |
| ⎯⎯⎯⎯⎯⎯⎯⎯⎯⎯⎯⎯⎯⎯⎯⎯⎯⎯⎯⎯⎯⎯⎯⎯⎯⎯⎯⎯⎯⎯⎯⎯⎯⎯⎯⎯⎯⎯⎯⎯⎯⎯⎯⎯ | | | |
| *nirK* | Copper-containing nitrite reductase [[*Ralstonia pickettii*]](https://www.ncbi.nlm.nih.gov/Taxonomy/Browser/wwwtax.cgi?id=329) (https://www.ncbi.nlm.nih.gov/gene/61389570) | | |
| *nirS* | Nitrite reductase[[*Pseudomonas aeruginosa* PAO1](https://www.ncbi.nlm.nih.gov/Taxonomy/Browser/wwwtax.cgi?id=208964)] (https://www.ncbi.nlm.nih.gov/gene/882217) | | |
| *norB* | Nitric oxide reductase subunit B [[*Pseudomonas aeruginosa* PAO1](https://www.ncbi.nlm.nih.gov/Taxonomy/Browser/wwwtax.cgi?id=208964)] (<https://www.ncbi.nlm.nih.gov/gene/882193>)  NorB is the catalytic subunit of the enzyme complex. Shows proton pump activity across the membrane in denitrifying bacterial cells. The mononitrogen reduction is probably coupled to electron transport phosphorylation. (https://www.uniprot.org/uniprot/P98008) | | |
| *norC* | Nitric oxide reductase subunit C [[*Pseudomonas aeruginosa* PAO1](https://www.ncbi.nlm.nih.gov/Taxonomy/Browser/wwwtax.cgi?id=208964)] (https://www.ncbi.nlm.nih.gov/gene/882200) | | |
| *nosZ* | Nitrous-oxide reductase (gene ID 879824) [[*Pseudomonas aeruginosa* PAO1](https://www.ncbi.nlm.nih.gov/Taxonomy/Browser/wwwtax.cgi?id=208964)] (https://www.ncbi.nlm.nih.gov/gene/?term=Pseudomonas+aeruginosa+nosZ) | | |
| ⎯⎯⎯⎯⎯⎯⎯⎯⎯⎯⎯⎯⎯⎯⎯⎯⎯⎯⎯⎯⎯⎯⎯⎯⎯⎯⎯⎯⎯⎯⎯⎯⎯⎯⎯⎯⎯⎯⎯⎯⎯⎯⎯⎯ | | | |
| **N2 fixation** | |
| ⎯⎯⎯⎯⎯⎯⎯⎯⎯⎯⎯⎯⎯⎯⎯⎯⎯⎯⎯⎯⎯⎯⎯⎯⎯⎯⎯⎯⎯⎯⎯⎯⎯⎯⎯⎯⎯⎯⎯⎯⎯⎯⎯⎯ | | | |
| *nifD* | Nitrogenase molybdenum-iron protein alpha chain [[*Rhodobacter capsulatus* SB 1003]](https://www.ncbi.nlm.nih.gov/Taxonomy/Browser/wwwtax.cgi?id=272942) (https://www.ncbi.nlm.nih.gov/gene/31489521) | | |
| *nifH* | Nitrogenase iron protein [[*Sinorhizobium meliloti* 2011](https://www.ncbi.nlm.nih.gov/Taxonomy/Browser/wwwtax.cgi?id=1286640)] 8 https://www.ncbi.nlm.nih.gov/gene/61599259)  *nifH1* Nitrogenase iron protein 1 The key enzymatic reactions in nitrogen fixation are catalyzed by the nitrogenase complex, which has 2 components: the iron protein (component 2) and a component 1 which is either a molybdenum-iron protein, a vanadium-iron, or an iron-iron protein. This subunit is associated with the molybdenum-iron nitrogenase component 2. (https://www.uniprot.org/uniprot/P00459) | | |
| ⎯⎯⎯⎯⎯⎯⎯⎯⎯⎯⎯⎯⎯⎯⎯⎯⎯⎯⎯⎯⎯⎯⎯⎯⎯⎯⎯⎯⎯⎯⎯⎯⎯⎯⎯⎯⎯⎯⎯⎯⎯⎯⎯⎯ | | | |
| Table S2. Continued.  ⎯⎯⎯⎯⎯⎯⎯⎯⎯⎯⎯⎯⎯⎯⎯⎯⎯⎯⎯⎯⎯⎯⎯⎯⎯⎯⎯⎯⎯⎯⎯⎯⎯⎯⎯⎯⎯⎯⎯⎯⎯⎯⎯⎯ | | | |
| **Anammox** | | | |
| ⎯⎯⎯⎯⎯⎯⎯⎯⎯⎯⎯⎯⎯⎯⎯⎯⎯⎯⎯⎯⎯⎯⎯⎯⎯⎯⎯⎯⎯⎯⎯⎯⎯⎯⎯⎯⎯⎯⎯⎯⎯⎯⎯⎯ | | | |
| *hzo* | Putative hydrazine oxidoreductase [Uncultured bacterium] (<https://www.uniprot.org/uniprot/A0A076E6779>) | | |
| ⎯⎯⎯⎯⎯⎯⎯⎯⎯⎯⎯⎯⎯⎯⎯⎯⎯⎯⎯⎯⎯⎯⎯⎯⎯⎯⎯⎯⎯⎯⎯⎯⎯⎯⎯⎯⎯⎯⎯⎯⎯⎯⎯⎯ | | | |

a <https://www.ncbi.nlm.nih.gov/gene/> and <https://www.uniprot.org/uniprot/> visited last on 19 of October 2021.

| ⎯⎯⎯⎯⎯⎯⎯⎯⎯⎯⎯⎯⎯⎯⎯⎯⎯⎯⎯⎯⎯⎯⎯⎯⎯⎯⎯⎯⎯⎯⎯⎯⎯⎯⎯⎯⎯⎯⎯⎯⎯⎯⎯⎯ |
| --- |
